# Supplementary material for: Immuno-genomic classification of colorectal cancer organoids reveals cancer cells with intrinsic immunogenic properties associated with patient survival
Source: PubMed Central journal article supplement (PMC8276416; doi:10.1186/s13046-021-02034-1), 2021-07-13
Supplement: 13046_2021_2034_MOESM1_ESM.pdf [file 13046_2021_2034_MOESM1_ESM.pdf]

Supplementary Table 1. Characteristics of 87 patients

| Sample ID    | Age | Sex | Type           | Differentiation | Subtype                   | Death | OS(day) | Recur | RFS(day) | CCO Morphology | MSI_PCR  | Location        | MSI_NGS | HLA.II.C.score | Co-IP | TIM class | k-means cluster |
|--------------|-----|-----|----------------|-----------------|---------------------------|-------|---------|-------|----------|----------------|----------|-----------------|---------|----------------|-------|-----------|-----------------|
| AMC-17CT-004 | 67  | F   | Adenocarcinoma | Moderate        | Conventional              | 0     | 1211    | 1     | 995      | R_RF           | MSS      | A-colon         | MSI-L/S | 0              | Yes   | Desert    | k2              |
| AMC-17CT-008 | 49  | F   | Adenocarcinoma | Moderate        | Conventional              | 0     | 1208    | 1     | 474      | R              | MSS      | Rectum          | MSI-L/S | 0.5            | Yes   | Exhausted | k2              |
| AMC-17CT-009 | 69  | F   | Adenocarcinoma | Moderate        | Conventional              | 0     | 1208    | 0     | 1191     | R_B            | MSS      | D-colon         | MSI-L/S | 3              | No    | Active    | k1              |
| AMC-17CT-010 | 54  | M   | Adenocarcinoma | Moderate        | Conventional              | 0     | 1207    | 0     | 1124     | R_B            | MSS      | Rectum          | MSI-L/S | 0              | Yes   | Active    | k4              |
| AMC-17CT-011 | 71  | M   | Adenocarcinoma | Moderate        | Conventional              | 0     | 1204    | 0     | 966      | RF             | MSS      | S-colon         | MSI-L/S | 0              | Yes   | Desert    | k4              |
| AMC-17CT-012 | 56  | M   | Adenocarcinoma | Moderate        | Conventional              | 0     | 1203    | 1     | 386      | R_B            | MSS      | Rectum          | MSI-L/S | 0              | No    | Exhausted | k1              |
| AMC-17CT-018 | 59  | F   | Adenocarcinoma | Moderate        | Conventional              | 0     | 1197    | 1     | 571      | R              | MSS      | D-colon         | MSI-L/S | 0              | No    | Exhausted | k1              |
| AMC-17CT-019 | 61  | M   | Adenocarcinoma | Moderate        | Conventional              | 0     | 1196    | 0     | 973      | RF             | MSI-Low  | S-colon         | MSI-L/S | 0              | Yes   | Exhausted | k1              |
| AMC-17CT-028 | 76  | M   | Adenocarcinoma | Moderate        | Conventional              | 1     | 703     | 0     | 0        | R              | MSS      | S-colon         | MSI-L/S | 0              | Yes   | Desert    | k2              |
| AMC-17CT-031 | 77  | F   | Adenocarcinoma | Moderate        | Mucinous and conventional | 1     | 94      | 0     | 0        | R              | MSS      | A-colon         | MSI-L/S | 0              | No    | Exhausted | k1              |
| AMC-17CT-032 | 59  | F   | Adenocarcinoma | Moderate        | Conventional              | 0     | 1189    | 0     | 1140     | R              | MSS      | Rectum          | MSI-L/S | 3              | Yes   | Active    | k3              |
| AMC-17CT-033 | 66  | M   | Adenocarcinoma | Moderate        | Conventional              | 0     | 1189    | 0     | 1184     | R_RF           | MSS      | Rectum          | MSI-L/S | 0              | No    | Desert    | k2              |
| AMC-17CT-035 | 65  | F   | Adenocarcinoma | Moderate        | Conventional              | 0     | 1187    | 0     | 1048     | R_RF           | MSS      | Cecum           | MSI-L/S | 2              | Yes   | Active    | k2              |
| AMC-17CT-036 | 63  | M   | Adenocarcinoma | Moderate        | Conventional              | 0     | 1187    | 0     | 1030     | R_RF           | MSS      | T-colon         | MSI-L/S | 2              | Yes   | Active    | k2              |
| AMC-17CT-037 | 65  | M   | Adenocarcinoma | Moderate        | Conventional              | 0     | 1186    | 0     | 1180     | R              | MSS      | S-colon         | MSI-L/S | 0              | Yes   | Desert    | k4              |
| AMC-17CT-039 | 76  | F   | Adenocarcinoma | Moderate        | Conventional              | 0     | 1183    | 0     | 589      | RF             | MSS      | T-colon         | MSI-L/S | 3              | No    | Active    | k4              |
| AMC-17CT-040 | 75  | M   | Adenocarcinoma | Poor            | Conventional              | 0     | 1182    | 0     | 1037     | R_B            | MSS      | A-colon         | MSI-L/S | 0              | Yes   | Active    | k1              |
| AMC-17CT-042 | 72  | F   | Adenocarcinoma | Moderate        | Conventional              | 0     | 1182    | 0     | 1178     | R              | MSS      | S-colon         | MSI-L/S | 0              | Yes   | Desert    | k4              |
| AMC-17CT-043 | 60  | M   | Adenocarcinoma | Moderate        | Conventional              | 0     | 1181    | 1     | 29       | R              | MSS      | Rectum          | MSI-L/S | 1.5            | No    | Desert    | k1              |
| AMC-17CT-044 | 76  | M   | Adenocarcinoma | Moderate        | Conventional              | 0     | 1180    | 0     | 1042     | R              | MSS      | A-colon         | MSI-L/S | 0              | No    | Desert    | k1              |
| AMC-17CT-045 | 63  | M   | Adenocarcinoma | Moderate        | Conventional              | 0     | 1180    | 0     | 1069     | R              | MSS      | A-colon         | MSI-L/S | 1.5            | Yes   | Desert    | k4              |
| AMC-17CT-046 | 59  | F   | Adenocarcinoma | Moderate        | Conventional              | 1     | 1066    | 1     | 317      | R              | MSS      | Rectum          | MSI-L/S | 0              | No    | Desert    | k2              |
| AMC-17CT-047 | 55  | M   | Adenocarcinoma | Moderate        | Conventional              | 0     | 1179    | 0     | 993      | R_RF           | MSS      | Rectum          | MSI-L/S | 3              | Yes   | Exhausted | k1              |
| AMC-17CT-048 | 55  | F   | Adenocarcinoma | Moderate        | Conventional              | 0     | 1179    | 0     | 1130     | R              | MSS      | T-colon         | MSI-L/S | 3              | Yes   | Exhausted | k2              |
| AMC-17CT-049 | 77  | F   | Adenocarcinoma | Moderate        | Conventional              | 1     | 35      | 1     | 31       | R_RF           | NA       | S-colon         | MSI-L/S | 0              | No    | Desert    | k1              |
| AMC-17CT-050 | 73  | F   | Adenocarcinoma | Moderate        | Conventional              | 0     | 1176    | 0     | 31       | R_RM           | MSS      | S-colon         | MSI-L/S | 0              | Yes   | Exhausted | k1              |
| AMC-17CT-051 | 56  | F   | Adenocarcinoma | Moderate        | Conventional              | 0     | 1176    | 0     | 997      | R_B            | MSI-High | A-colon         | MSI-H   | 0              | No    | Exhausted | k2              |
| AMC-17CT-052 | 62  | M   | Adenocarcinoma | Moderate        | Conventional              | 0     | 1176    | 0     | 997      | R_B            | MSS      | A-colon         | MSI-L/S | 0              | Yes   | Exhausted | k2              |
| AMC-17CT-053 | 49  | M   | Adenocarcinoma | Moderate        | Conventional              | 0     | 1175    | 1     | 202      | R              | MSS      | Cecum           | MSI-L/S | 0              | Yes   | Desert    | k3              |
| AMC-17CT-054 | 61  | F   | Adenocarcinoma | Moderate        | Conventional              | 0     | 1174    | 0     | 1021     | R_RF           | MSS      | S-colon         | MSI-L/S | 0              | Yes   | Exhausted | k1              |
| AMC-17CT-055 | 49  | F   | Adenocarcinoma | Moderate        | Conventional              | 0     | 1173    | 0     | 979      | R_B            | MSS      | S-colon         | MSI-L/S | 0              | No    | Desert    | k3              |
| AMC-17CT-056 | 75  | M   | Adenocarcinoma | Moderate        | Conventional              | 1     | 748     | 1     | 354      | R_B            | MSS      | Rectum          | MSI-L/S | 3              | Yes   | Exhausted | k1              |
| AMC-17CT-057 | 56  | M   | Adenocarcinoma | Moderate        | Conventional              | 0     | 1172    | 0     | 1166     | R_B            | MSS      | S-colon         | MSI-L/S | 2              | Yes   | Exhausted | k1              |
| AMC-17CT-058 | 47  | F   | Adenocarcinoma | Moderate        | Conventional              | 0     | 1172    | 0     | 235      | R_RF           | MSS      | Rectum          | MSI-L/S | 0              | No    | Exhausted | k1              |
| AMC-17CT-059 | 61  | M   | Adenocarcinoma | Moderate        | Conventional              | 0     | 1169    | 0     | 792      | R_RF           | MSS      | Rectum          | MSI-L/S | 0              | No    | Exhausted | k1              |
| AMC-17CT-060 | 84  | M   | Adenocarcinoma | Moderate        | Conventional              | 0     | 1169    | 0     | 1163     | R              | MSS      | Hepatic flexure | MSI-L/S | 2.5            | Yes   | Active    | k3              |
| AMC-17CT-062 | 56  | M   | Adenocarcinoma | Moderate        | Conventional              | 0     | 1168    | 1     | 206      | R_B            | MSI-Low  | S-colon         | MSI-L/S | 0.5            | No    | Active    | k2              |
| AMC-17CT-063 | 51  | M   | Adenocarcinoma | Moderate        | Conventional              | 1     | 937     | 1     | 616      | R              | MSS      | Rectum          | MSI-L/S | 0.5            | No    | Active    | k1              |
| AMC-17CT-065 | 75  | F   | Adenocarcinoma | Poor            | Conventional              | 0     | 1167    | 0     | 244      | R              | MSI-Low  | S-colon         | MSI-L/S | 0              | No    | Exhausted | k1              |
| AMC-17CT-066 | 47  | M   | Adenocarcinoma | Moderate        | Conventional              | 0     | 1168    | 1     | 314      | R              | MSS      | Rectum          | MSI-L/S | 2              | Yes   | Exhausted | k1              |
| AMC-17CT-068 | 62  | F   | Adenocarcinoma | Moderate        | Conventional              | 1     | 978     | 0     | 876      | R_B            | MSS      | S-colon         | MSI-L/S | 0              | No    | Desert    | k3              |
| AMC-17CT-069 | 60  | F   | Adenocarcinoma | Moderate        | Conventional              | 0     | 1165    | 0     | 958      | R_RF           | MSS      | Rectum          | MSI-L/S | 2              | Yes   | Desert    | k1              |
| AMC-17CT-072 | 60  | M   | Adenocarcinoma | Moderate        | Conventional              | 0     | 1162    | 0     | 16       | R              | MSS      | S-colon         | MSI-L/S | 0              | No    | Desert    | k3              |
| AMC-17CT-073 | 53  | M   | Adenocarcinoma | Moderate        | Conventional              | 1     | 915     | 1     | 31       | R              | MSS      | Rectum          | MSI-L/S | 0              | Yes   | Exhausted | k1              |
| AMC-17CT-074 | 55  | M   | Adenocarcinoma | Moderate        | Conventional              | 0     | 1161    | 0     | 5        | R              | MSS      | Cecum           | MSI-L/S | 0              | Yes   | Desert    | k1              |
| AMC-17CT-075 | 66  | M   | Adenocarcinoma | Moderate        | Conventional              | 0     | 1158    | 1     | 19       | R              | MSS      | Rectum          | MSI-L/S | 0.5            | Yes   | Desert    | k4              |
| AMC-17CT-078 | 59  | M   | Adenocarcinoma | Moderate        | Conventional              | 0     | 1153    | 0     | 993      | R              | MSS      | S-colon         | MSI-L/S | 0              | No    | Desert    | k1              |
| AMC-17CT-079 | 83  | F   | Adenocarcinoma | Moderate        | Mucinous and conventional | 0     | 1153    | 0     | 923      | R_RM           | MSS      | Rectum          | MSI-L/S | 0              | Yes   | Active    | k4              |
| AMC-17CT-080 | 60  | F   | Adenocarcinoma | Moderate        | Conventional              | 0     | 1152    | 0     | 848      | R_RF           | MSS      | S-colon         | MSI-L/S | 0              | Yes   | Desert    | k1              |
| AMC-17CT-081 | 56  | F   | Adenocarcinoma | Moderate        | Conventional              | 0     | 1154    | 0     | 34       | R              | MSS      | A-colon         | MSI-L/S | 0.5            | Yes   | Desert    | k4              |
| AMC-17CT-082 | 61  | F   | Adenocarcinoma | Well            | Conventional              | 0     | 1148    | 0     | 953      | R_RM           | MSS      | A-colon         | MSI-L/S | 0              | Yes   | Desert    | k3              |
| AMC-17CT-083 | 60  | M   | Adenocarcinoma | Moderate        | Conventional              | 0     | 1148    | 0     | 556      | R_RF           | MSS      | S-colon         | MSI-L/S | 0.5            | No    | Exhausted | k1              |
| AMC-17CT-084 | 72  | M   | Adenocarcinoma | Moderate        | Conventional              | 0     | 1146    | 0     | 498      | R              | MSS      | Rectum          | MSI-L/S | 0              | Yes   | Exhausted | k2              |
| AMC-17CT-085 | 50  | M   | Adenocarcinoma | Moderate        | Conventional              | 0     | 1146    | 0     | 232      | R              | MSS      | S-colon         | MSI-L/S | 0              | No    | Exhausted | k4              |
| AMC-17CT-086 | 74  | M   | Adenocarcinoma | Moderate        | Conventional              | 0     | 1141    | 0     | 463      | R_B            | MSS      | Rectum          | MSI-L/S | 0              | No    | Desert    | k1              |
| AMC-17CT-088 | 88  | M   | Adenocarcinoma | Moderate        | Conventional              | 0     | 1140    | 0     | 517      | R_B            | MSS      | S-colon         | MSI-L/S | 0              | Yes   | Desert    | k1              |
| AMC-17CT-089 | 64  | F   | Adenocarcinoma | Moderate        | Conventional              | 0     | 1139    | 0     | 1022     | R              | MSS      | A-colon         | MSI-L/S | 2.5            | Yes   | Active    | k2              |
| AMC-17CT-090 | 50  | F   | Adenocarcinoma | Moderate        | Conventional              | 0     | 1139    | 0     | 449      | R              | MSS      | S-colon         | MSI-L/S | 0              | Yes   | Exhausted | k2              |
| AMC-17CT-091 | 72  | M   | Adenocarcinoma | Moderate        | Signet ring cell          | 1     | 445     | 0     | 351      | RF             | MSS      | Rectum          | MSI-L/S | 0              | No    | Active    | k2              |
| AMC-17CT-093 | 82  | F   | Adenocarcinoma | Poor            | Conventional              | 1     | 782     | 1     | 376      | RF             | MSS      | A-colon         | MSI-L/S | 0              | No    | Active    | k1              |
| AMC-17CT-095 | 75  | M   | Adenocarcinoma | Moderate        | Conventional              | 0     | 1132    | 0     | 978      | R              | MSS      | S-colon         | MSI-L/S | 1              | Yes   | Desert    | k2              |
| AMC-17CT-096 | 56  | F   | Adenocarcinoma | Moderate        | Conventional              | 0     | 1132    | 0     | 1002     | R              | MSS      | D-colon         | MSI-L/S | 0              | Yes   | Active    | k3              |
| AMC-17CT-097 | 58  | F   | Adenocarcinoma | Moderate        | Conventional              | 0     | 1130    | 0     | 668      | R              | MSS      | S-colon         | MSI-L/S | 0.5            | Yes   | Desert    | k1              |
| AMC-17CT-099 | 62  | F   | Adenocarcinoma | Moderate        | Conventional              | 0     | 1117    | 0     | 960      | R              | MSS      | S-colon         | MSI-L/S | 3              | Yes   | Active    | k3              |
| AMC-17CT-101 | 60  | M   | Adenocarcinoma | Moderate        | Conventional              | 0     | 1112    | 0     | 1064     | R              | MSS      | Rectum          | MSI-L/S | 1.5            | Yes   | Exhausted | k3              |
| AMC-17CT-103 | 69  | M   | Adenocarcinoma | Moderate        | Conventional              | 0     | 1111    | 0     | 1030     | R              | MSI-High | Cecum           | MSI-H   | 3              | Yes   | Exhausted | k4              |
| AMC-17CT-106 | 57  | M   | Adenocarcinoma | Moderate        | Conventional              | 0     | 1110    | 0     | 986      | R              | MSS      | S-colon         | MSI-L/S | 0              | No    | Desert    | k1              |
| AMC-17CT-107 | 57  | M   | Adenocarcinoma | Moderate        | Conventional              | 0     | 1110    | 0     | 973      | RF_RM          | MSS      | Rectum          | MSI-L/S | 2.5            | Yes   | Exhausted | k4              |
| AMC-17CT-108 | 94  | M   | Adenocarcinoma | Moderate        | Conventional              | 1     | 133     | 0     | 28       | R_B            | MSS      | S-colon         | MSI-L/S | 0              | Yes   | Desert    | k2              |
| AMC-17CT-109 | 28  | F   | Adenocarcinoma | Moderate        | Conventional              | 0     | 1109    | 1     | 937      | RM_RF          | MSS      | S-colon         | MSI-L/S | 0              | No    | Desert    | k4              |
| AMC-17CT-111 | 67  | M   | Adenocarcinoma | Moderate        | Conventional              | 0     | 1106    | 0     | 962      | R_B            | MSI-High | A-colon         | MSI-H   | 2.5            | Yes   | Exhausted | k4              |
| AMC-17CT-112 | 53  | M   | Adenocarcinoma | Moderate        | Mucinous and conventional | 0     | 1105    | 0     | 932      | R              | MSS      | T-colon         | MSI-L/S | 0              | Yes   | Desert    | k4              |
| AMC-17CT-113 | 53  | M   | Adenocarcinoma | Well            | Conventional              | 0     | 1105    | 0     | 897      | R              | MSI-Low  | S-colon         | MSI-L/S | 2              | No    | Desert    | k1              |
| AMC-17CT-114 | 48  | M   | Adenocarcinoma | Moderate        | Conventional              | 0     | 1104    | 0     | 938      | R_RF_RM        | MSS      | S-colon         | MSI-L/S | 0              | Yes   | Desert    | k3              |
| AMC-17CT-115 | 56  | M   | Adenocarcinoma | Moderate        | Conventional              | 0     | 1104    | 0     | 1055     | R_RF_RM        | MSS      | S-colon         | MSI-L/S | 0.5            | Yes   | Desert    | k2              |
| AMC-17CT-116 | 63  | F   | Adenocarcinoma | Moderate        | Mucinous and conventional | 0     | 1103    | 0     | 991      | R_RM           | MSS      | S-colon         | MSI-L/S | 0              | Yes   | Desert    | k2              |
| AMC-17CT-117 | 59  | M   | Adenocarcinoma | Well            | Conventional              | 0     | 1103    | 0     | 1033     | RF             | MSS      | S-colon         | MSI-L/S | 0              | Yes   | Desert    | k2              |
| AMC-17CT-120 | 69  | F   | Adenocarcinoma | Moderate        | Conventional              | 0     | 1097    | 0     | 411      | R_RM           | MSS      | A-colon         | MSI-L/S | 2              | Yes   | Active    | k4              |
| AMC-17CT-121 | 57  | M   | Adenocarcinoma | Moderate        | Conventional              | 0     | 1096    | 0     | 973      | RF             | MSS      | S-colon         | MSI-L/S | 0              | Yes   | Active    | k1              |
| AMC-17CT-123 | 48  | F   | Adenocarcinoma | Moderate        | Conventional              | 1     | 170     | 1     | 16       | R              | MSS      | Splenic flexure | MSI-L/S | 0.5            | Yes   | Desert    | k1              |
| AMC-17CT-125 | 75  | M   | Adenocarcinoma | Moderate        | Conventional              | 1     | 521     | 1     | 22       | R              | MSS      | A-colon         | MSI-L/S | 0              | No    | Exhausted | k1              |
| AMC-17CT-131 | 68  | M   | Adenocarcinoma | Moderate        | Mucinous and conventional | 1     | 661     | 1     | 183      | R              | MSS      | A-colon         | MSI-L/S | 0              | No    | Exhausted | k4              |
| AMC-17CT-135 | 74  | M   | Adenocarcinoma | Moderate        | Conventional              | 0     | 1081    | 0     | 886      | R_B            | MSS      | Rectum          | MSI-L/S | 0.5            | Yes   | Active    | k2              |
| AMC-17CT-138 | 36  | M   | Adenocarcinoma | Moderate        | Conventional              | 0     | 1078    | 0     | 962      | R              | MSS      | Rectum          | MSI-L/S | 0              | Yes   | Exhausted | k4              |
| AMC-17CT-139 | 73  | F   | Adenocarcinoma | Moderate        | Conventional              | 0     | 1077    | 0     | 828      | R              | MSS      | A-colon         | MSI-L/S | 0              | Yes   | Active    | k4              |
| AMC-17CT-146 | 61  | M   | Adenocarcinoma | Moderate        | Conventional              | 1     | 538     | 0     | 463      | R_B            | MSS      | Rectum          | MSI-L/S | 0              | No    | Desert    | k3              |
| AMC-17CT-147 | 48  | F   | Adenocarcinoma | Well            | Conventional              | 0     | 1071    | 0     | 787      | R              | MSI-High | T-colon         | MSI-H   | 0              | No    | Exhausted | k4              |
