# Supplementary material for: Immuno-genomic classification of colorectal cancer organoids reveals cancer cells with intrinsic immunogenic properties associated with patient survival
Source: PubMed Central journal article supplement (PMC8276416; doi:10.1186/s13046-021-02034-1), 2021-07-13

Fig. S3

**a**

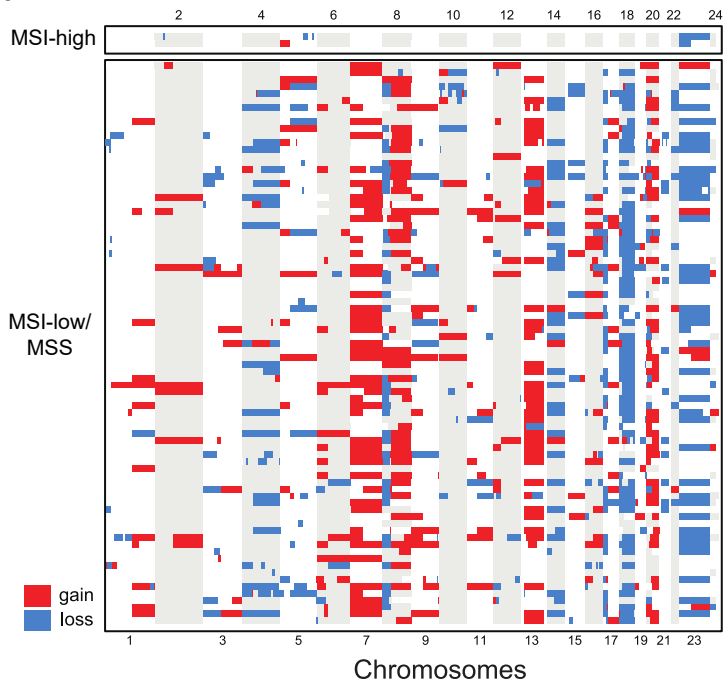

**b**

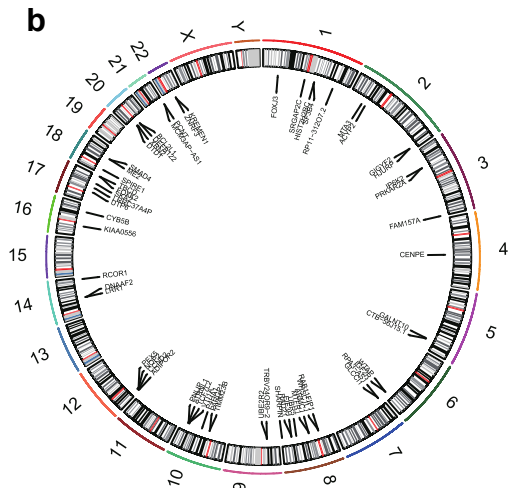

|                     |                      |
|---------------------|----------------------|
| PEX5-NOP2           | FOXJ3-EPB41L1        |
| IP6K2-PRKAR2A       | HJURP-GIGYF2         |
| KIF3B-COMMD7        | VTI1A-PNLIP          |
| XRN2-RP11-560A15.3  | RPA3-AS1-GLCC1       |
| FAM157A-SPIRE1      | TM9SF4-DTD1          |
| WHSC1L1-DNAAF2      | TPX2-DEFB122         |
| RAD21-EIF3H         | TPX2-HCK             |
| ZNRF3-KREMEN1       | MCM3AP-AS1-PCNT      |
| ME2-SMAD4           | UBE2R2-TRBV24OR9-2   |
| ADIPOR2-CCND2       | CYB5B-KIAA0556       |
| TCF7L2-ATRN1        | MTA3-ACYP2           |
| CENPE-SKA2          | LRRC37A4P-P4HA1      |
| SHARPIN-UBR5        | TIMM23B-PARGP1       |
| TOP1-ARFGEF2        | HIST2H2BC-SF3B4      |
| BCL2L1-EFCAB8       | RP11-31207.2-SRGAP2C |
| RAB11FIP1-UTP6      | RCOR1-LRR1           |
| GALNT10-CTB-56J15.1 |                      |
| ARMC1-MTFR1         |                      |
| FOXP2-TBCD          |                      |
| IGF2R-WTAP          |                      |

**c**

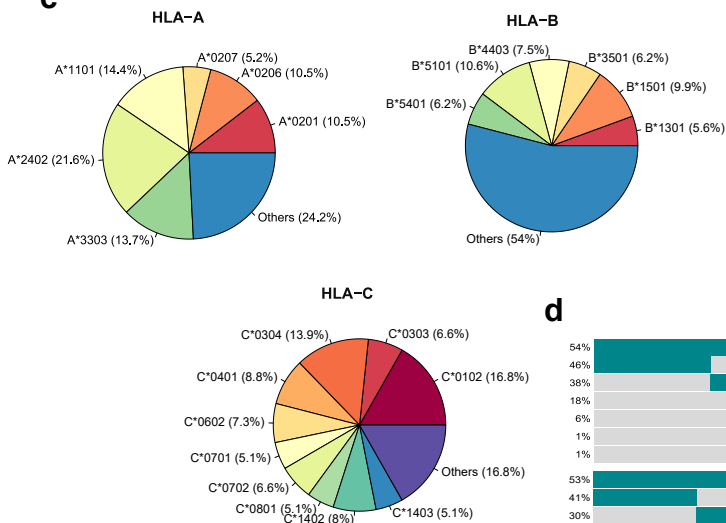

**d**

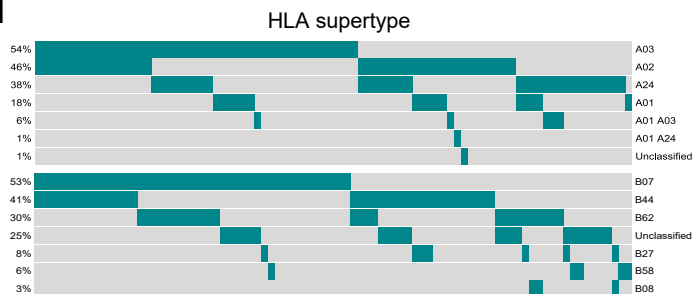

Supplement: 13046_2021_2034_MOESM4_ESM.pdf [file 13046_2021_2034_MOESM4_ESM.pdf]
