# Supplementary material for: Immuno-genomic classification of colorectal cancer organoids reveals cancer cells with intrinsic immunogenic properties associated with patient survival
Source: PubMed Central journal article supplement (PMC8276416; doi:10.1186/s13046-021-02034-1), 2021-07-13
Supplement: 13046_2021_2034_MOESM5_ESM.pdf [file 13046_2021_2034_MOESM5_ESM.pdf]

Fig. S4

**a**

Correlation matrix based on the whole genes expression

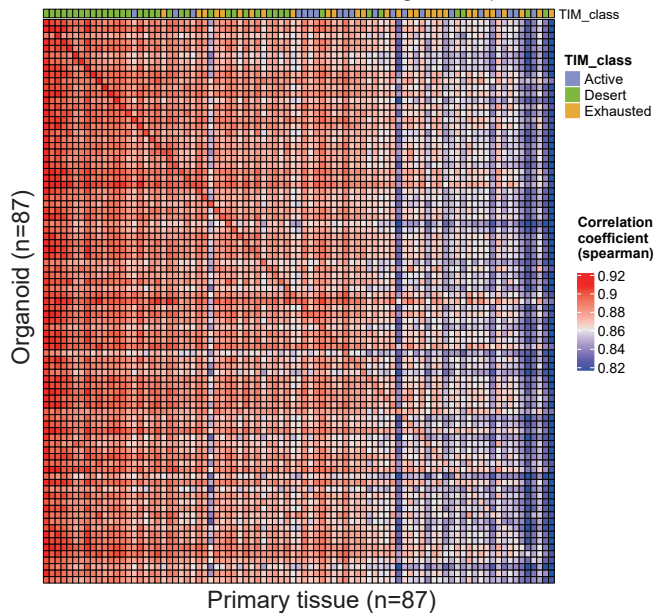

**b**

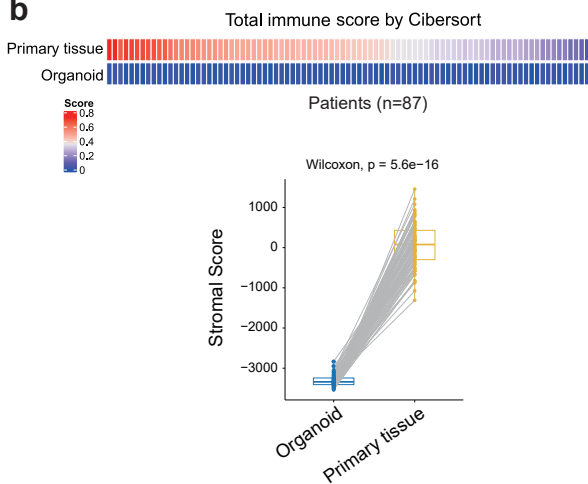

**c**

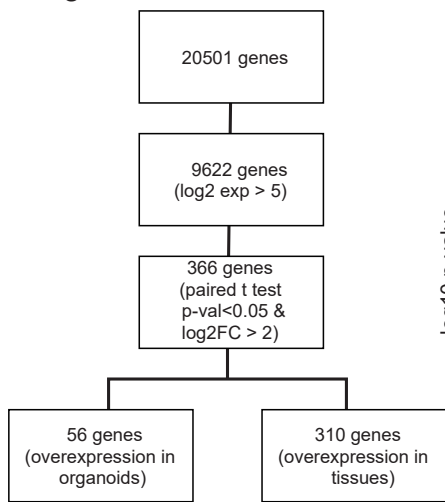

Upregulated in organoids

Upregulated in primary tumor tissues

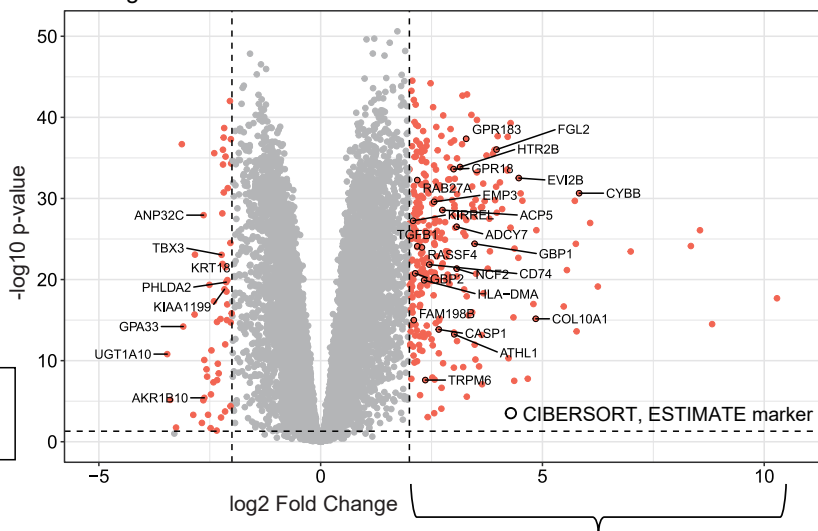

**d**

Differentiation markers

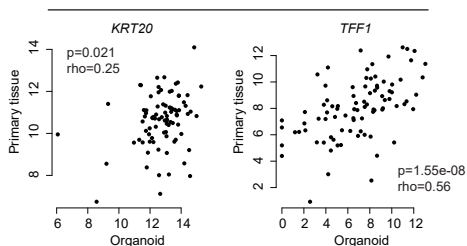

Stem cell markers for crypt base columnar cell of intestinal epithelium

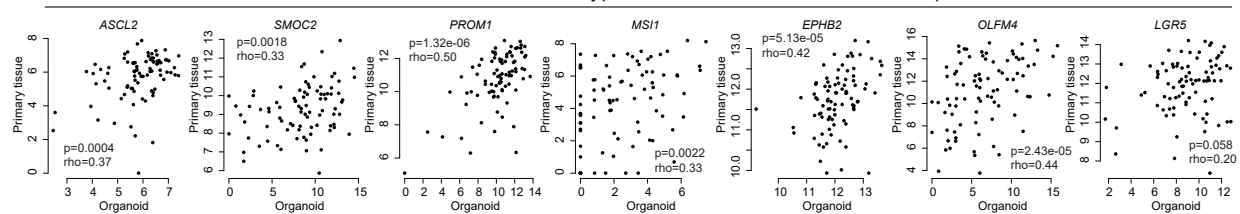

| Category         | Term                               | Genes | Count | %       | P-value | FDR |
|------------------|------------------------------------|-------|-------|---------|---------|-----|
| GOTERM_CC_DIRECT | extracellular matrix               | 29    | 10.6  | 3.3E-17 | 8.4E-15 |     |
| LP_KEYWORDS      | Extracellular matrix               | 24    | 8.8   | 5.7E-14 | 1.6E-11 |     |
| GOTERM_BP_DIRECT | extracellular matrix organization  | 20    | 7.3   | 4.9E-12 | 7.2E-9  |     |
| GOTERM_CC_DIRECT | proteinaceous extracellular matrix | 22    | 8.1   | 1.5E-11 | 1.9E-9  |     |
| GOTERM_CC_DIRECT | extracellular space                | 40    | 14.7  | 3.5E-7  | 2.9E-5  |     |
| LP_KEYWORDS      | Immunity                           | 17    | 6.2   | 3.2E-4  | 7.5E-3  |     |
