# Supplementary material for: Immuno-genomic classification of colorectal cancer organoids reveals cancer cells with intrinsic immunogenic properties associated with patient survival
Source: PubMed Central journal article supplement (PMC8276416; doi:10.1186/s13046-021-02034-1), 2021-07-13
Supplement: 13046_2021_2034_MOESM6_ESM.pdf [file 13046_2021_2034_MOESM6_ESM.pdf]

Fig. S5

Proliferation of cancer cells

**a**

Ki-67 labeling index  
by pathologist

Ki-67 labeling index  
by image analysis

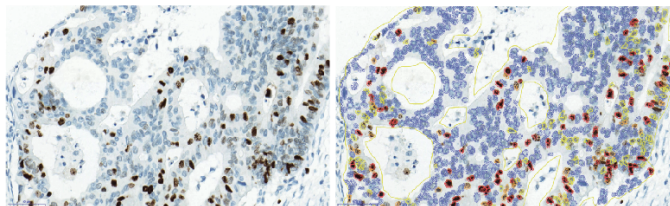

**b**

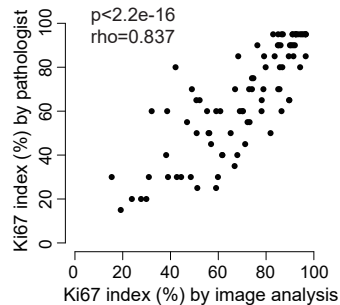

**c**

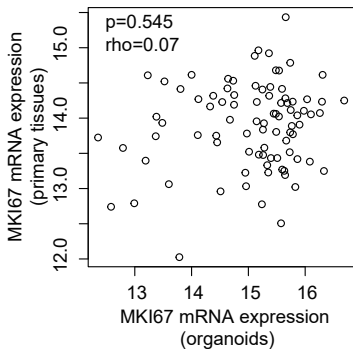

**d**

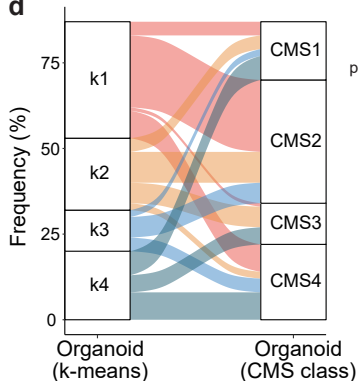

$p = 0.0005$

|    | CMS1 | CMS2 | CMS3 | CMS4 |
|----|------|------|------|------|
| k1 | 4    | 21   | 1    | 8    |
| k2 | 4    | 9    | 6    | 2    |
| k3 | 2    | 6    | 0    | 4    |
| k4 | 7    | 0    | 5    | 8    |

k1 subgroup: high proliferation with MYC pathway activation  
CMS2 : WNT and MYC activation

k4 subgroup: mesenchymal  
CMS4: mesenchymal including TGF-beta activation
