# Supplementary material for: Immuno-genomic classification of colorectal cancer organoids reveals cancer cells with intrinsic immunogenic properties associated with patient survival
Source: PubMed Central journal article supplement (PMC8276416; doi:10.1186/s13046-021-02034-1), 2021-07-13

Fig. S12

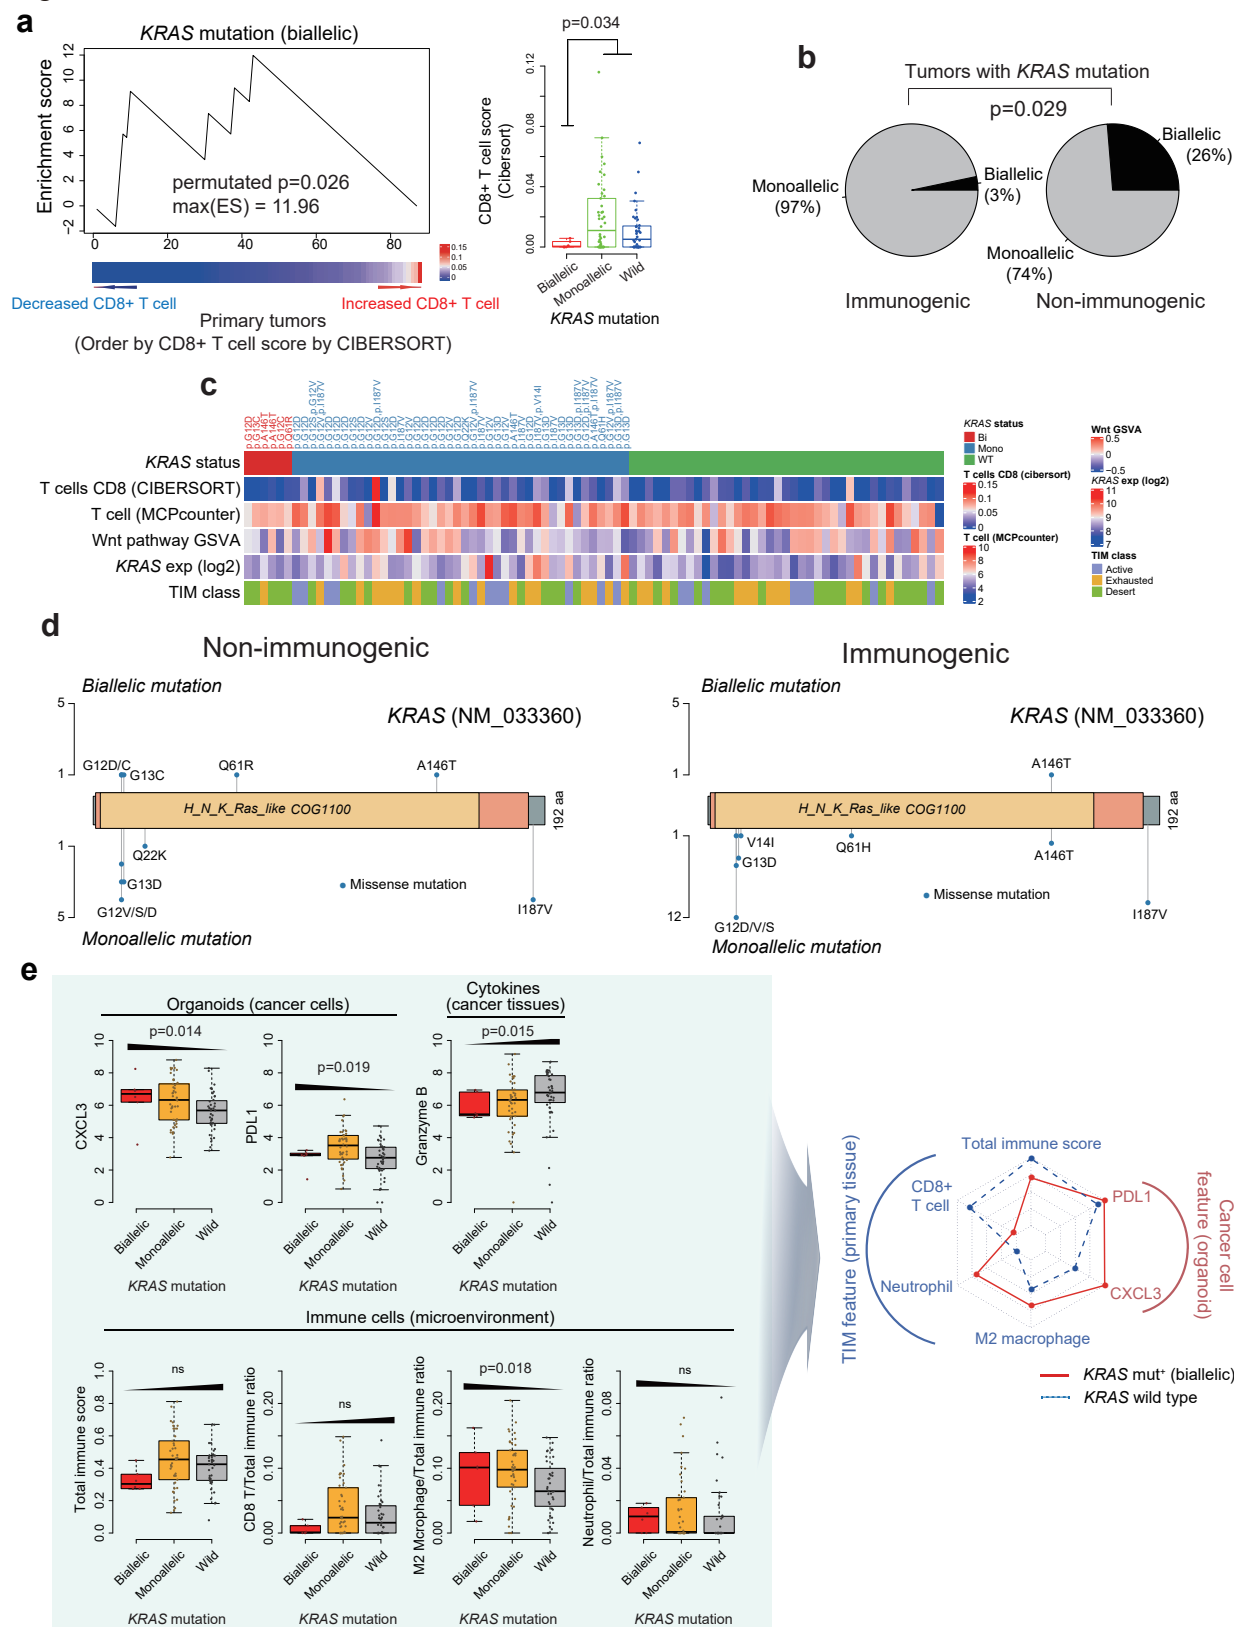

Supplement: 13046_2021_2034_MOESM13_ESM.pdf [file 13046_2021_2034_MOESM13_ESM.pdf]
